# Supplementary material
Source: ML conference proceedings conference paper supplement (https://www.ecva.net/papers/eccv_2020/papers_ECCV/html/123620018_ECCV_2020_paper.php)
Supplement: Supplementary file 1 [file 123620018-supp.pdf]

## Appendices

### A Sample Results of Pororo-SV Dataset

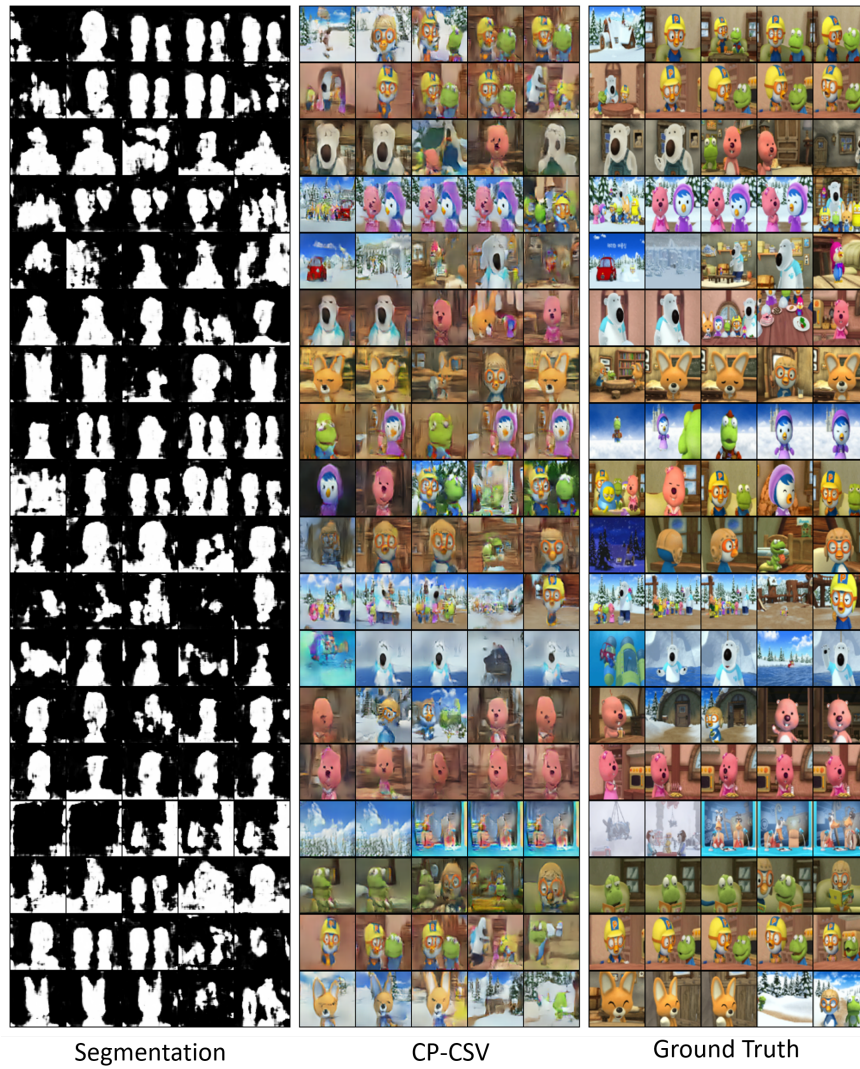

Fig. 7: Left two columns are the generated segmentation and image sequences of CP-CSV on Pororo-SV test dataset, and the ground truths are on the right side.

**B Sample Results of Clever Dataset**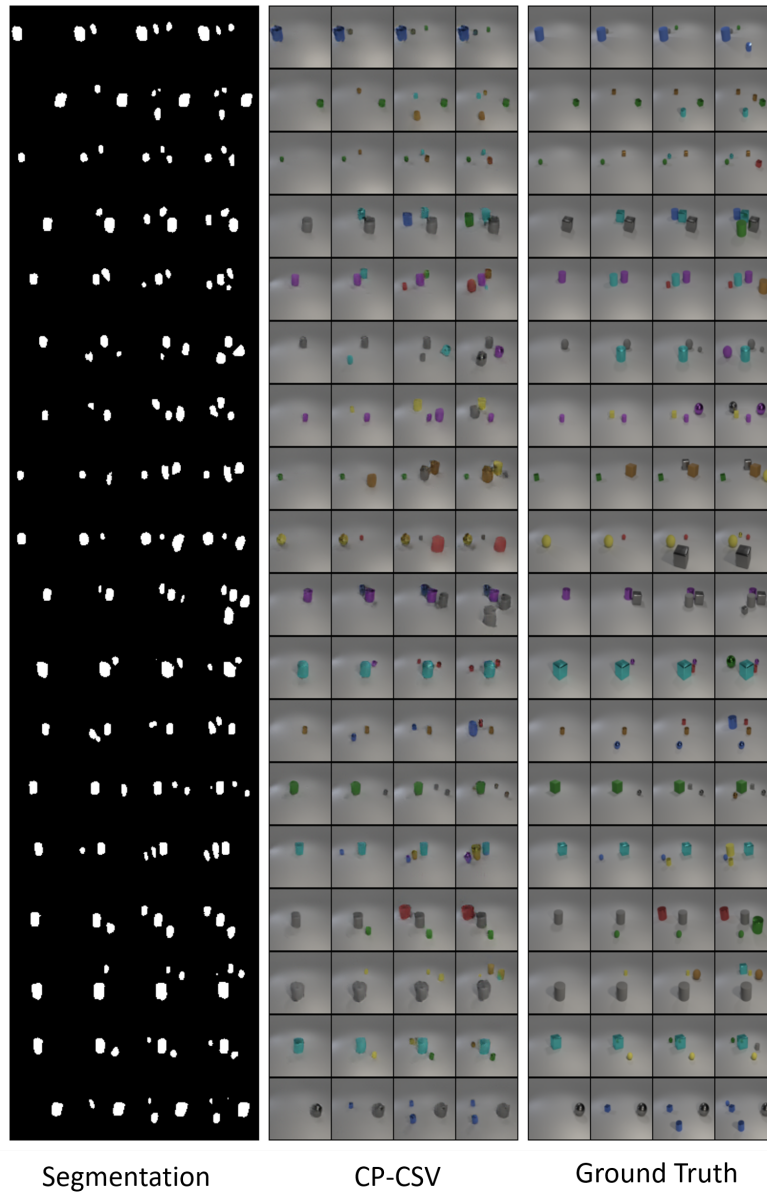

Fig. 8: The sequence length of Clever dataset is four. Left two columns are the generated segmentation and image sequences of CP-CSV on test dataset, and the ground truths are on the right side.

## C Sample Results with Different FSD

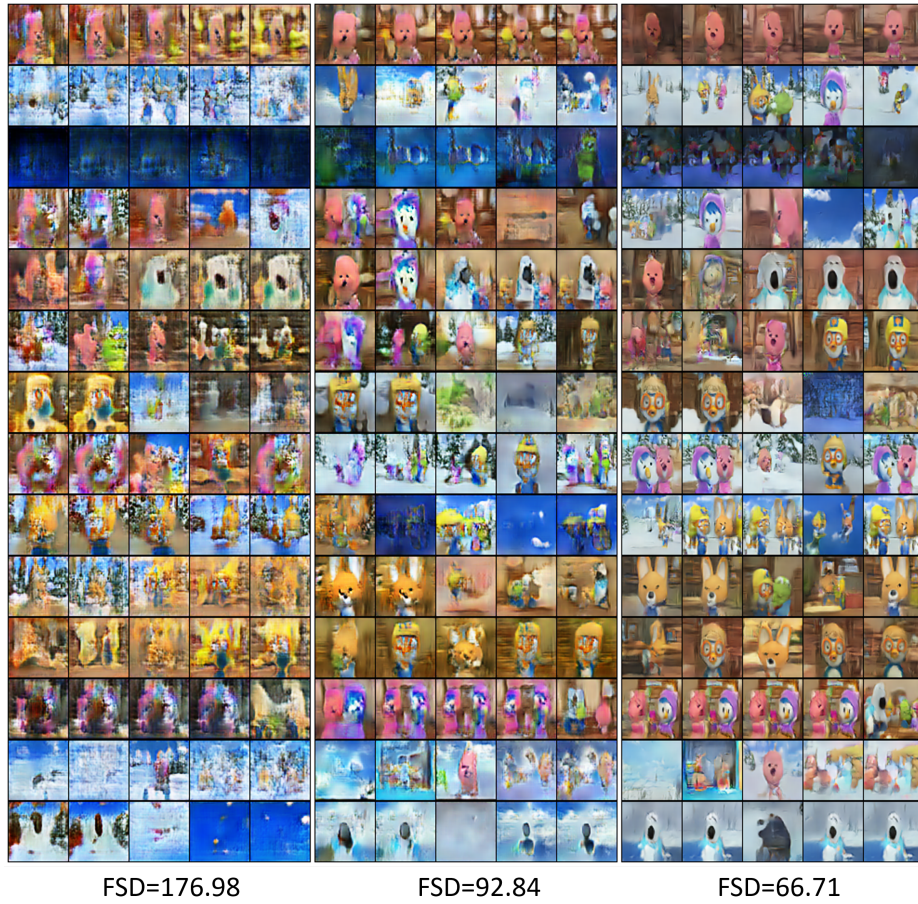

Fig. 9: The generated samples of CP-CSV on Pororo-SV test dataset under different training epochs. The FSD scores are 176.98, 92.84, 66.71, from left to right.
